# Supplementary material
Source: MDPI journal article supplement (https://www.mdpi.com/2073-4441/14/19/3097)
Supplement: s1 [file s1]

# Potential Contribution of Coastal Upwelling to Carbon Sink Through Interaction Between Cyanobacteria and Microbial Eukaryotes

Xiuping Liu <sup>1</sup>, Ningdong Xie <sup>1</sup>, Jiaqian Li <sup>1</sup>, Mohan Bai <sup>1</sup>, Biswarup Sen <sup>1,\*</sup> and Guangyi Wang <sup>1,2,3,4,\*</sup>

<sup>1</sup> Center for Marine Environmental Ecology, School of Environmental Science and Engineering, Tianjin University, Tianjin 300072, China

<sup>2</sup> Frontiers Science Center for Synthetic Biology, Tianjin University, Tianjin 300072, China

<sup>3</sup> Key Laboratory of Systems Bioengineering (MOE), Tianjin University, Tianjin 300072, China

<sup>4</sup> Center for Biosafety Research and Strategy, Tianjin University, Tianjin 300072, China

\* Correspondence: bsen@tju.edu.cn (B.S.); gywang@tju.edu.cn (G.W.) .

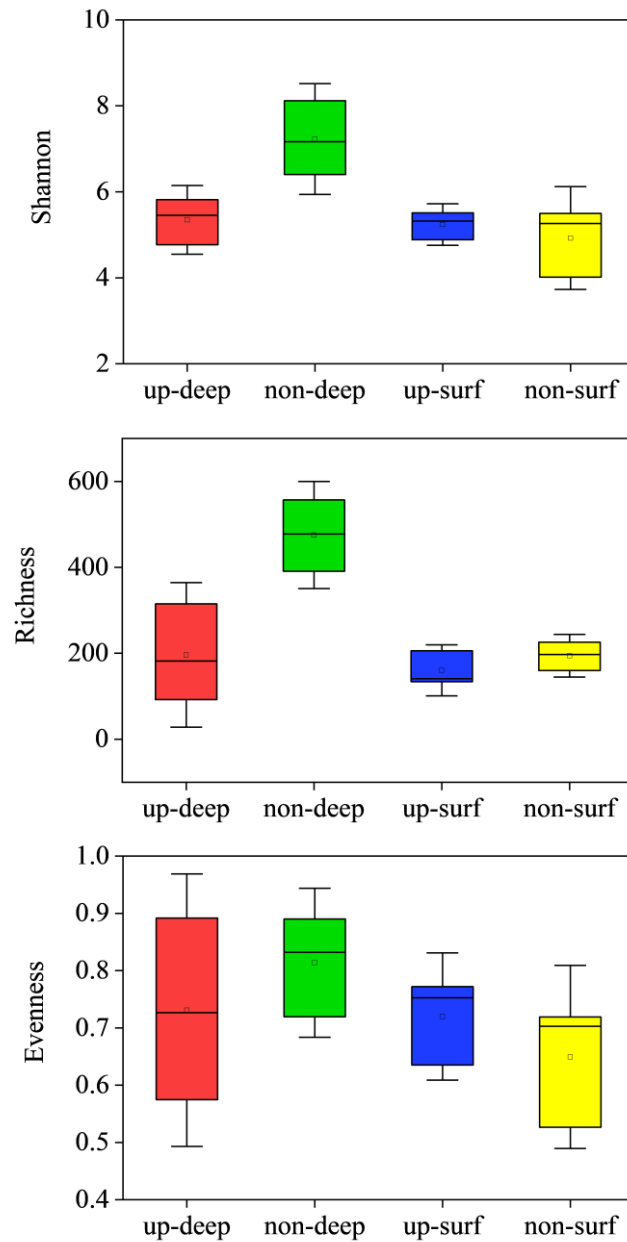

**Figure S1.** Shannon (a), Richness (b), and Evenness (c) for the bacterial communities from different habitats. Labels “non-deep”, “non-surf”, “up-deep” and “up-surf” represent non-upwelling deep water, non-upwelling surface water, upwelling deep water, and upwelling surface water, respectively. The boxes represent the ranges of the first and third quartiles, the line and small square inside each box represent the median and mean values, and the ends of the whiskers represent the lowest and highest datums (mean  $\pm$  1.5 SD).

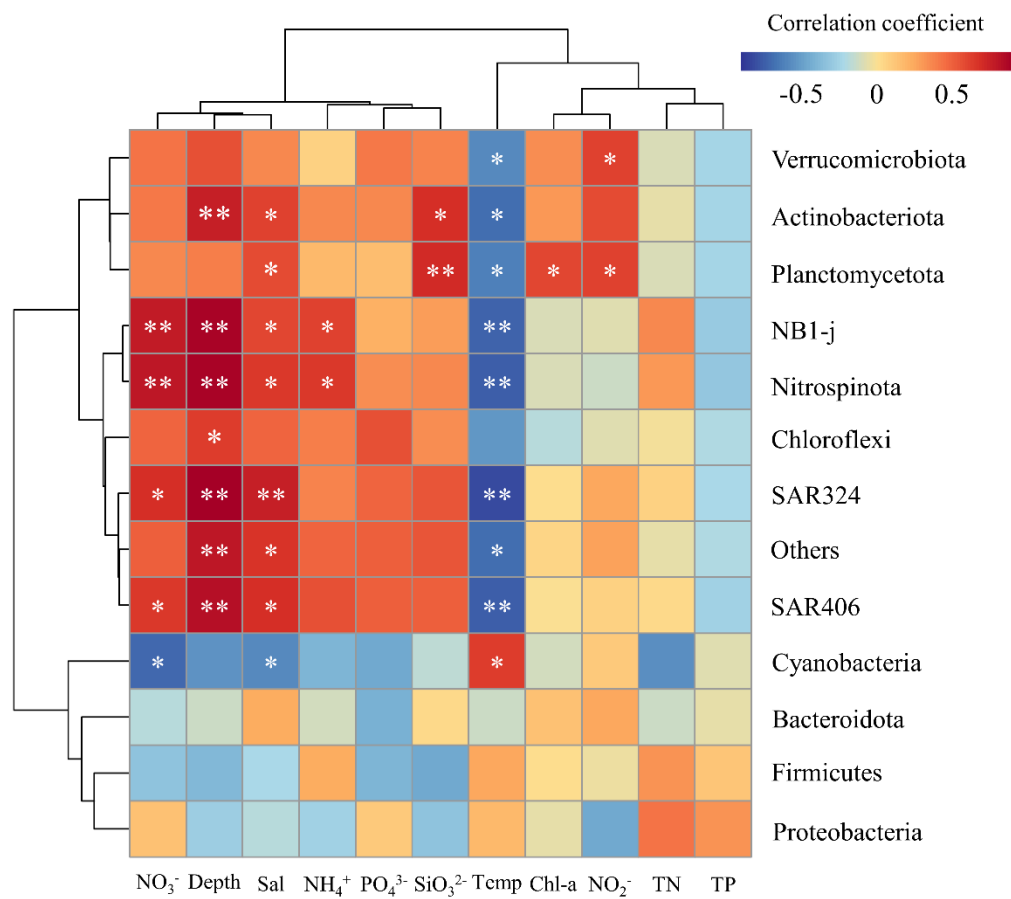

**Figure S2.** Correlations between environmental parameters and bacterial phyla. Asterisks indicate  $p < 0.05$  and the color bar is based on the scale of Pearson's correlation coefficients.

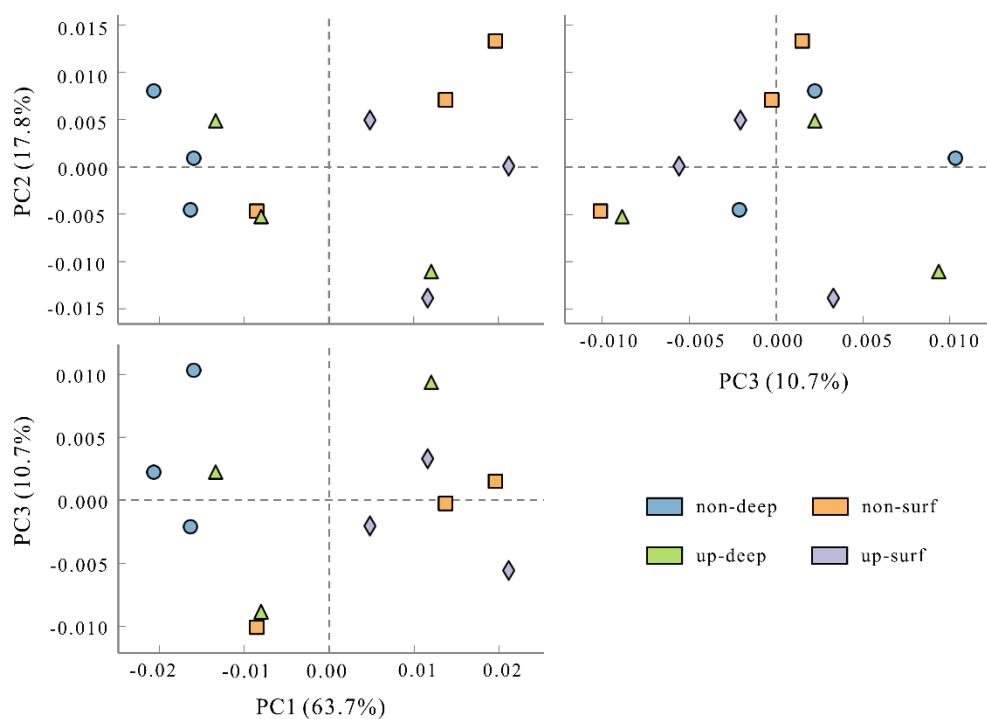

**Figure S3.** Principal component analysis based on the predicted KEGG pathways. Labels “non-deep”, “non-surf”, “up-deep” and “up-surf” represent non-upwelling deep water, non-upwelling surface water, upwelling deep water, and upwelling surface water, respectively.

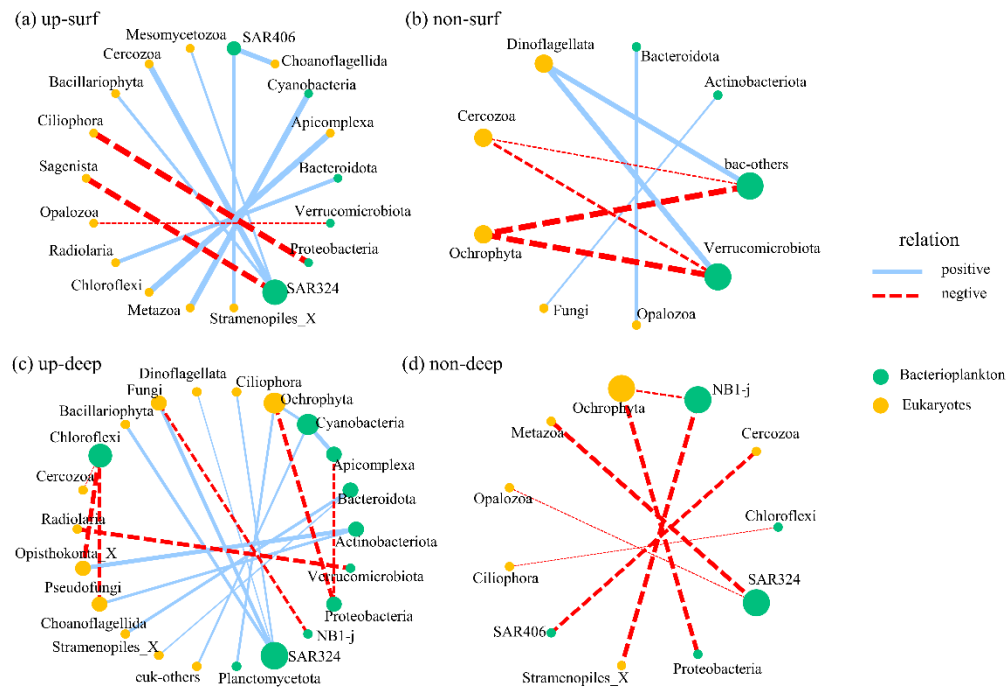

**Figure S4.** A network analysis of associations between bacterioplankton and microbial eukaryotes in (a) upwelling surface water, (b) non-upwelling surface water, (c) upwelling deep water, (d) non-upwelling deep water. The bacterioplankton phyla and microbial eukaryotes phyla are represented by circles with distinctive colors. The size of the nodes represented the relative abundances of each microbe. The blue and red lines between the nodes represent positive or negative correlations, respectively. The thickness of the line represents the strength of correlation.

**Table S1.** Location, depth, temperature, and salinity of environmental samples

| Region        | Station | Longitude | Latitude | Samples | Depth(m) | Temperature(°C) | Salinity(‰) |
|---------------|---------|-----------|----------|---------|----------|-----------------|-------------|
| Upwelling     | 1       | 111.1940  | 20.0005  | S1      | 3        | 26.06           | 33.55       |
|               |         |           |          | D1      | 40       | 21.72           | 34.35       |
|               | 2       | 111.1001  | 19.7002  | S2      | 3        | 26.9            | 34.00       |
|               |         |           |          | D2      | 30       | 20.88           | 34.44       |
|               | 3       | 110.6998  | 18.9024  | S3      | 3        | 26.48           | 34.09       |
|               |         |           |          | D3      | 75       | 19.44           | 34.54       |
| Non-upwelling | 4       | 111.9399  | 19.9916  | S4      | 3        | 29.02           | 33.81       |
|               |         |           |          | D4      | 80       | 20.52           | 34.40       |
|               | 5       | 111.9012  | 19.4811  | S5      | 3        | 29.44           | 33.66       |
|               |         |           |          | D5      | 100      | 18.93           | 34.57       |
|               | 6       | 111.1017  | 18.4994  | S6      | 3        | 30.2            | 34.00       |
|               |         |           |          | D6      | 150      | 16.42           | 34.59       |

**Table S2.** Potential environmental factors for the bacterial phyla composition revealed by RDA

| Name                           | Explains % | pseudo-F | P     | P(adj)  |
|--------------------------------|------------|----------|-------|---------|
| Depth*                         | 57.2       | 13.4     | 0.002 | 0.011   |
| Temperature                    | 49.6       | 9.8      | 0.002 | 0.011   |
| Salinity                       | 45.2       | 8.3      | 0.004 | 0.01467 |
| NO <sub>3</sub> <sup>-</sup>   | 36.7       | 5.8      | 0.012 | 0.033   |
| SiO <sub>3</sub> <sup>2-</sup> | 30.2       | 4.3      | 0.016 | 0.0352  |
| NH <sub>4</sub> <sup>+</sup>   | 25.1       | 3.3      | 0.048 | 0.088   |

Note: The listed environmental factors were significant in terms of simple effects; The asterisk indicates the association was significant in terms of conditional effect.
